# Supplementary material for: Validation of the General and Sport Nutrition Knowledge Questionnaire (GeSNK) in Spanish Adolescents
Source: MDPI journal article supplement (doi:10.3390/nu14245324), 2022-12-15
Supplement: s1 [file s1]

# S1. GeNSK- General and Sport Nutrition Knowledge Questionnaire

The purpose of this questionnaire is to identify myths and false nutritional beliefs in order to improve nutritional education programs

Name/Surname:

Gender: Male ☐ Female ☐

Date of Birth:

Weight: Height:

Employment father/mother:

Level of education father/mother:

Do you practice any Sport? YES ☐ NO ☐

Sport:

How many times a week:

Average length: (minutes per day):

My knowledge about healthy eating are driven by: (you can choose more than one answer)

|                                                |                          |                                             |                          |
|------------------------------------------------|--------------------------|---------------------------------------------|--------------------------|
| Nutritional education programs at school       | <input type="checkbox"/> | From what I watch on the TV                 | <input type="checkbox"/> |
| Nutritional education programs in other places | <input type="checkbox"/> | From the web                                | <input type="checkbox"/> |
| From my teachers                               | <input type="checkbox"/> | From my friends                             | <input type="checkbox"/> |
| From my parents                                | <input type="checkbox"/> | I have no knowledge about to healthy eating | <input type="checkbox"/> |
| From my coaches                                | <input type="checkbox"/> | Anything else.....                          |                          |

## SECTION 1: GENERAL NUTRITION

Following are the questions refer to the nutritional composition of some foods. Choose the answer with an X.

1. The Carbohydrate content of such foods is:

|                   |   | High                     |   | Low or absent            |  | I do not know            |
|-------------------|---|--------------------------|---|--------------------------|--|--------------------------|
| Boiled ham        |   | <input type="checkbox"/> | * | <input type="checkbox"/> |  | <input type="checkbox"/> |
| White bread       | * | <input type="checkbox"/> |   | <input type="checkbox"/> |  | <input type="checkbox"/> |
| Tomato            |   | <input type="checkbox"/> | * | <input type="checkbox"/> |  | <input type="checkbox"/> |
| Apple             |   | <input type="checkbox"/> | * | <input type="checkbox"/> |  | <input type="checkbox"/> |
| Ricotta           |   | <input type="checkbox"/> | * | <input type="checkbox"/> |  | <input type="checkbox"/> |
| Breakfast cereals | * | <input type="checkbox"/> |   | <input type="checkbox"/> |  | <input type="checkbox"/> |

2. The Protein content of such foods is:

|              |   | High                     |   | Low or absent            |  | I do not know            |
|--------------|---|--------------------------|---|--------------------------|--|--------------------------|
| Chicken meat | * | <input type="checkbox"/> |   | <input type="checkbox"/> |  | <input type="checkbox"/> |
| Dried beans  | * | <input type="checkbox"/> |   | <input type="checkbox"/> |  | <input type="checkbox"/> |
| Pear         |   | <input type="checkbox"/> | * | <input type="checkbox"/> |  | <input type="checkbox"/> |
| Rice         |   | <input type="checkbox"/> | * | <input type="checkbox"/> |  | <input type="checkbox"/> |
| Codfish      | * | <input type="checkbox"/> |   | <input type="checkbox"/> |  | <input type="checkbox"/> |
| Parmesan     | * | <input type="checkbox"/> |   | <input type="checkbox"/> |  | <input type="checkbox"/> |
| Chocolate    |   | <input type="checkbox"/> | * | <input type="checkbox"/> |  | <input type="checkbox"/> |

3. The Fat content of such foods is:

|                 |   | High                     |   | Low or absent            |  | I do not know            |
|-----------------|---|--------------------------|---|--------------------------|--|--------------------------|
| Salami          | * | <input type="checkbox"/> |   | <input type="checkbox"/> |  | <input type="checkbox"/> |
| Mayonnaise      | * | <input type="checkbox"/> |   | <input type="checkbox"/> |  | <input type="checkbox"/> |
| Dried chickpeas |   | <input type="checkbox"/> | * | <input type="checkbox"/> |  | <input type="checkbox"/> |
| Pasta           |   | <input type="checkbox"/> | * | <input type="checkbox"/> |  | <input type="checkbox"/> |
| Butter          | * | <input type="checkbox"/> |   | <input type="checkbox"/> |  | <input type="checkbox"/> |
| Jam             |   | <input type="checkbox"/> | * | <input type="checkbox"/> |  | <input type="checkbox"/> |

4. The Fiber content of such foods is:

|               |   | High                     |   | Low or absent            |  | I do not know            |
|---------------|---|--------------------------|---|--------------------------|--|--------------------------|
| Honey         |   | <input type="checkbox"/> | * | <input type="checkbox"/> |  | <input type="checkbox"/> |
| Brown bread   | * | <input type="checkbox"/> |   | <input type="checkbox"/> |  | <input type="checkbox"/> |
| Chicken broth |   | <input type="checkbox"/> | * | <input type="checkbox"/> |  | <input type="checkbox"/> |
| Potatoes      |   | <input type="checkbox"/> | * | <input type="checkbox"/> |  | <input type="checkbox"/> |
| Pear          | * | <input type="checkbox"/> |   | <input type="checkbox"/> |  | <input type="checkbox"/> |
| White bread   |   | <input type="checkbox"/> | * | <input type="checkbox"/> |  | <input type="checkbox"/> |

5. The Salt content of such foods is:

|             |   | High                     |   | Low or absent            |  | I do not know            |
|-------------|---|--------------------------|---|--------------------------|--|--------------------------|
| White bread | ° | <input type="checkbox"/> |   | <input type="checkbox"/> |  | <input type="checkbox"/> |
| Courgettes  |   | <input type="checkbox"/> | * | <input type="checkbox"/> |  | <input type="checkbox"/> |
| Canned peas | * | <input type="checkbox"/> |   | <input type="checkbox"/> |  | <input type="checkbox"/> |
| Canned tuna | * | <input type="checkbox"/> |   | <input type="checkbox"/> |  | <input type="checkbox"/> |
| Frozen peas |   | <input type="checkbox"/> | * | <input type="checkbox"/> |  | <input type="checkbox"/> |

6. The Calcium content of such food is:

|               |   | High                     |   | Low or absent            |  | I do not know            |
|---------------|---|--------------------------|---|--------------------------|--|--------------------------|
| Turkey breast |   | <input type="checkbox"/> | * | <input type="checkbox"/> |  | <input type="checkbox"/> |
| Peas          |   | <input type="checkbox"/> | * | <input type="checkbox"/> |  | <input type="checkbox"/> |
| Walnut        | * | <input type="checkbox"/> |   | <input type="checkbox"/> |  | <input type="checkbox"/> |
| Olive oil     |   | <input type="checkbox"/> | * | <input type="checkbox"/> |  | <input type="checkbox"/> |
| Brown bread   | * | <input type="checkbox"/> |   | <input type="checkbox"/> |  | <input type="checkbox"/> |

7. The Iron content of such foods is:

|           |   | High                     |   | Low or absent            |  | I do not know            |
|-----------|---|--------------------------|---|--------------------------|--|--------------------------|
| Calf meat | * | <input type="checkbox"/> |   | <input type="checkbox"/> |  | <input type="checkbox"/> |
| Apple     |   | <input type="checkbox"/> | * | <input type="checkbox"/> |  | <input type="checkbox"/> |
| Honey     |   | <input type="checkbox"/> | * | <input type="checkbox"/> |  | <input type="checkbox"/> |
| Sea bass  | * | <input type="checkbox"/> |   | <input type="checkbox"/> |  | <input type="checkbox"/> |

8. The Potassium content of such foods is:

|               |   | High                     |   | Low or absent            |  | I do not know            |
|---------------|---|--------------------------|---|--------------------------|--|--------------------------|
| Pasta         |   | <input type="checkbox"/> | * | <input type="checkbox"/> |  | <input type="checkbox"/> |
| Dried lentils | * | <input type="checkbox"/> |   | <input type="checkbox"/> |  | <input type="checkbox"/> |
| Olive oil     |   | <input type="checkbox"/> | * | <input type="checkbox"/> |  | <input type="checkbox"/> |
| Honey         |   | <input type="checkbox"/> | * | <input type="checkbox"/> |  | <input type="checkbox"/> |

Are these claims true or false? (only one answer is possible)

|    |                                                                                     |                                |                                 |                                        |
|----|-------------------------------------------------------------------------------------|--------------------------------|---------------------------------|----------------------------------------|
| 9  | The egg white is high in cholesterol                                                | TRUE <input type="checkbox"/>  | *FALSE <input type="checkbox"/> | I DO NOT KNOW <input type="checkbox"/> |
| 10 | The high-fat meals are ever high in cholesterol                                     | TRUE <input type="checkbox"/>  | *FALSE <input type="checkbox"/> | I DO NOT KNOW <input type="checkbox"/> |
| 11 | The olive oil is high in monounsaturated fat                                        | *TRUE <input type="checkbox"/> | FALSE <input type="checkbox"/>  | I DO NOT KNOW <input type="checkbox"/> |
| 12 | The dried fruit is a good source of essential fatty acids                           | *TRUE <input type="checkbox"/> | FALSE <input type="checkbox"/>  | I DO NOT KNOW <input type="checkbox"/> |
| 13 | The ripened cheese are saltier than the fresh one                                   | *TRUE <input type="checkbox"/> | FALSE <input type="checkbox"/>  | I DO NOT KNOW <input type="checkbox"/> |
| 14 | An high-energy food is exclusively a fat food                                       | TRUE <input type="checkbox"/>  | *FALSE <input type="checkbox"/> | I DO NOT KNOW <input type="checkbox"/> |
| 15 | The brown bread is richer in fiber than the white one                               | *TRUE <input type="checkbox"/> | FALSE <input type="checkbox"/>  | I DO NOT KNOW <input type="checkbox"/> |
| 16 | Bran is the outer part of the grain kernel that is very high in fiber               | *TRUE <input type="checkbox"/> | FALSE <input type="checkbox"/>  | I DO NOT KNOW <input type="checkbox"/> |
| 17 | Tinned pulses are saltier than the dry one                                          | *TRUE <input type="checkbox"/> | FALSE <input type="checkbox"/>  | I DO NOT KNOW <input type="checkbox"/> |
| 18 | Omega-3 and omega-6 are particular fatty acids                                      | *TRUE <input type="checkbox"/> | FALSE <input type="checkbox"/>  | I DO NOT KNOW <input type="checkbox"/> |
| 19 | Our body creates vitamin D from direct sunlight on our skin when we are outdoors    | *TRUE <input type="checkbox"/> | FALSE <input type="checkbox"/>  | I DO NOT KNOW <input type="checkbox"/> |
| 20 | The iron in meat are more easily absorbed than the same mineral found in vegetables | *TRUE <input type="checkbox"/> | FALSE <input type="checkbox"/>  | I DO NOT KNOW <input type="checkbox"/> |
| 21 | A variety of foods contain a natural amount of sodium                               | *TRUE <input type="checkbox"/> | FALSE <input type="checkbox"/>  | I DO NOT KNOW <input type="checkbox"/> |
| 22 | Dairy are a good iron source                                                        | TRUE <input type="checkbox"/>  | *FALSE <input type="checkbox"/> | I DO NOT KNOW <input type="checkbox"/> |
| 23 | Carrots are a good source of vitamin A                                              | *TRUE <input type="checkbox"/> | FALSE <input type="checkbox"/>  | I DO NOT KNOW <input type="checkbox"/> |

**24. The glycemic index food: (only one answer is possible)**

indicates the foods carbohydrates content

indicates the food's effect on a person's blood glucose

indicates the food's effect on a person's blood glucose after the ingestion of protein

indicates the foods energy density

\*

☐  
☐  
☐  
☐
**Are these claims true or false? (only one answer is possible)**

|    |                                                                                                                        |                                |                                 |                                        |
|----|------------------------------------------------------------------------------------------------------------------------|--------------------------------|---------------------------------|----------------------------------------|
| 25 | An unbalanced diet is the only risk factor for the development of cardiovascular disease                               | TRUE <input type="checkbox"/>  | *FALSE <input type="checkbox"/> | I DO NOT KNOW <input type="checkbox"/> |
| 26 | In the obesity the diet play an important role, physical activity no                                                   | TRUE <input type="checkbox"/>  | *FALSE <input type="checkbox"/> | I DO NOT KNOW <input type="checkbox"/> |
| 27 | A low calcium and vitamin D intake during life, associated with a lack of physical activity may increase fracture risk | *TRUE <input type="checkbox"/> | FALSE <input type="checkbox"/>  | I DO NOT KNOW <input type="checkbox"/> |
| 28 | The fiber helps to ease constipation                                                                                   | *TRUE <input type="checkbox"/> | FALSE <input type="checkbox"/>  | I DO NOT KNOW <input type="checkbox"/> |
| 29 | To obtain a healthy weight loss the carbohydrates must not be removed from the diet                                    | *TRUE <input type="checkbox"/> | FALSE <input type="checkbox"/>  | I DO NOT KNOW <input type="checkbox"/> |

**SECTION 2: SPORT NUTRITION****Are these claims true or false? (only one answer is possible)**

|    |                                                                                                                     |                                |                                 |                                        |
|----|---------------------------------------------------------------------------------------------------------------------|--------------------------------|---------------------------------|----------------------------------------|
| 30 | To eat carbohydrate is no good for an athlete                                                                       | TRUE <input type="checkbox"/>  | *FALSE <input type="checkbox"/> | I DO NOT KNOW <input type="checkbox"/> |
| 31 | B-group vitamins play an important role in muscle metabolism                                                        | *TRUE <input type="checkbox"/> | FALSE <input type="checkbox"/>  | I DO NOT KNOW <input type="checkbox"/> |
| 32 | Athletes must reduce the fat intake to a minimum                                                                    | TRUE <input type="checkbox"/>  | *FALSE <input type="checkbox"/> | I DO NOT KNOW <input type="checkbox"/> |
| 33 | Consuming carbohydrates after 5 pm can enhance performance                                                          | TRUE <input type="checkbox"/>  | *FALSE <input type="checkbox"/> | I DO NOT KNOW <input type="checkbox"/> |
| 34 | Eating more protein will make muscles bigger                                                                        | TRUE <input type="checkbox"/>  | *FALSE <input type="checkbox"/> | I DO NOT KNOW <input type="checkbox"/> |
| 35 | For a sporty person, the daily intake should not include more than 15% of fats                                      | TRUE <input type="checkbox"/>  | *FALSE <input type="checkbox"/> | I DO NOT KNOW <input type="checkbox"/> |
| 36 | Athletes can eat whatever they want because they have a fast metabolism                                             | TRUE <input type="checkbox"/>  | *FALSE <input type="checkbox"/> | I DO NOT KNOW <input type="checkbox"/> |
| 37 | Physical exercise is the main factor improving muscular strength                                                    | *TRUE <input type="checkbox"/> | FALSE <input type="checkbox"/>  | I DO NOT KNOW <input type="checkbox"/> |
| 38 | An excessive dietary protein intake can lead to liver and kidney damage                                             | *TRUE <input type="checkbox"/> | FALSE <input type="checkbox"/>  | I DO NOT KNOW <input type="checkbox"/> |
| 39 | An athlete must have a meal at the end of the training session                                                      | *TRUE <input type="checkbox"/> | FALSE <input type="checkbox"/>  | I DO NOT KNOW <input type="checkbox"/> |
| 40 | To reduce pasta, potato and bread intake during the training period is needed                                       | TRUE <input type="checkbox"/>  | *FALSE <input type="checkbox"/> | I DO NOT KNOW <input type="checkbox"/> |
| 41 | A man and woman of the same age, practicing the same sport have the same energy requirements                        | TRUE <input type="checkbox"/>  | *FALSE <input type="checkbox"/> | I DO NOT KNOW <input type="checkbox"/> |
| 42 | It is advisable for an athlete eating a low glycemic index meal but rich in carbohydrates, 1-2 hours after training | *TRUE <input type="checkbox"/> | FALSE <input type="checkbox"/>  | I DO NOT KNOW <input type="checkbox"/> |
| 43 | Athletes practicing extensive training have double protein requirement than the general population                  | *TRUE <input type="checkbox"/> | FALSE <input type="checkbox"/>  | I DO NOT KNOW <input type="checkbox"/> |
| 44 | Drinking fluids before, during and after a competition is needed                                                    | *TRUE <input type="checkbox"/> | FALSE <input type="checkbox"/>  | I DO NOT KNOW <input type="checkbox"/> |
| 45 | Coaches must not allow drinking fluid during a training                                                             | TRUE <input type="checkbox"/>  | *FALSE <input type="checkbox"/> | I DO NOT KNOW <input type="checkbox"/> |
| 46 | The best advice for athletes is to drink when they are thirsty                                                      | TRUE <input type="checkbox"/>  | *FALSE <input type="checkbox"/> | I DO NOT KNOW <input type="checkbox"/> |
| 47 | For an athlete, cold water quenches thirst better                                                                   | TRUE <input type="checkbox"/>  | *FALSE <input type="checkbox"/> | I DO NOT KNOW <input type="checkbox"/> |
| 48 | Athletes can use ice cube to quench their thirst during training                                                    | TRUE <input type="checkbox"/>  | *FALSE <input type="checkbox"/> | I DO NOT KNOW <input type="checkbox"/> |
| 49 | A great deal to support performance in athletes is water                                                            | *TRUE <input type="checkbox"/> | FALSE <input type="checkbox"/>  | I DO NOT KNOW <input type="checkbox"/> |

|           |                                                            |                                 |                                        |
|-----------|------------------------------------------------------------|---------------------------------|----------------------------------------|
| <b>50</b> | <i>Sports drinks and energy drinks are the same things</i> |                                 |                                        |
|           | TRUE <input type="checkbox"/>                              | *FALSE <input type="checkbox"/> | I DO NOT KNOW <input type="checkbox"/> |
| <b>51</b> | <i>Sports drinks contain minerals</i>                      |                                 |                                        |
|           | *TRUE <input type="checkbox"/>                             | FALSE <input type="checkbox"/>  | I DO NOT KNOW <input type="checkbox"/> |

**52. What is the most appropriate beverage after two hours of training?**

- |               |                            |
|---------------|----------------------------|
| Energy drink  | <input type="checkbox"/>   |
| Sports drink  | * <input type="checkbox"/> |
| Fruit juice   | <input type="checkbox"/>   |
| Cola          | <input type="checkbox"/>   |
| I do not know | <input type="checkbox"/>   |

**Are these claims true or false? (only one answer is possible)**

|           |                                                                                                                  |                                 |                                        |
|-----------|------------------------------------------------------------------------------------------------------------------|---------------------------------|----------------------------------------|
| <b>53</b> | <i>For athletes, supplements can be used as valid meals replacement</i>                                          |                                 |                                        |
|           | TRUE <input type="checkbox"/>                                                                                    | *FALSE <input type="checkbox"/> | I DO NOT KNOW <input type="checkbox"/> |
| <b>54</b> | <i>For athletes, it is impossible to reach the iron requirement they need supplements</i>                        |                                 |                                        |
|           | TRUE <input type="checkbox"/>                                                                                    | *FALSE <input type="checkbox"/> | I DO NOT KNOW <input type="checkbox"/> |
| <b>55</b> | <i>Sports drinks contain caffeine</i>                                                                            |                                 |                                        |
|           | TRUE <input type="checkbox"/>                                                                                    | *FALSE <input type="checkbox"/> | I DO NOT KNOW <input type="checkbox"/> |
| <b>56</b> | <i>If athletes are not able to fulfill their proteins requirement, they need to take amino acids supplements</i> |                                 |                                        |
|           | *TRUE <input type="checkbox"/>                                                                                   | FALSE <input type="checkbox"/>  | I DO NOT KNOW <input type="checkbox"/> |
| <b>57</b> | <i>Supplements are necessary both in professional and recreational sports</i>                                    |                                 |                                        |
|           | TRUE <input type="checkbox"/>                                                                                    | *FALSE <input type="checkbox"/> | I DO NOT KNOW <input type="checkbox"/> |
| <b>58</b> | <i>Food supplements are safe so it is right to use them without any expert advice</i>                            |                                 |                                        |
|           | TRUE <input type="checkbox"/>                                                                                    | *FALSE <input type="checkbox"/> | I DO NOT KNOW <input type="checkbox"/> |
| <b>59</b> | <i>In strength sports, vitamin c supplements are ever required</i>                                               |                                 |                                        |
|           | TRUE <input type="checkbox"/>                                                                                    | *FALSE <input type="checkbox"/> | I DO NOT KNOW <input type="checkbox"/> |
| <b>60</b> | <i>Unseasoned meals are the best choice for muscle building and toning</i>                                       |                                 |                                        |
|           | TRUE <input type="checkbox"/>                                                                                    | *FALSE <input type="checkbox"/> | I DO NOT KNOW <input type="checkbox"/> |
| <b>61</b> | <i>Meat and egg white contain protein, other foods not. This is the foundation of the athlete's nutrition</i>    |                                 |                                        |
|           | TRUE <input type="checkbox"/>                                                                                    | *FALSE <input type="checkbox"/> | I DO NOT KNOW <input type="checkbox"/> |
| <b>62</b> | <i>Athletes can eat "light" products at will</i>                                                                 |                                 |                                        |
|           | TRUE <input type="checkbox"/>                                                                                    | *FALSE <input type="checkbox"/> | I DO NOT KNOW <input type="checkbox"/> |

## S2. GeNSK- Cuestionario de Conocimientos sobre Nutrición General y Deportiva

**El objetivo de este cuestionario es identificar mitos y falsas creencias nutricionales para mejorar los programas de educación nutricional**

**Nombre/Apellido:**

**Género:** Mujer ☐ Hombre ☐

**Fecha de nacimiento:**

**Peso:**                      **Altura:**

**Empleo padre/madre:**

**Nivel de educación padre/madre:**

**¿Practica algún deporte?**    Sí ☐ NO ☐

**Deporte:**

**¿Cuántas veces a la semana:**

**Duración media:** (minutos al día):

**Mis conocimientos sobre la alimentación saludable están impulsados por: (puede elegir más de una respuesta)**

|                                                     |                          |                                                  |                          |
|-----------------------------------------------------|--------------------------|--------------------------------------------------|--------------------------|
| Programas de educación nutricional en la escuela    | <input type="checkbox"/> | Por lo que veo en la televisión                  | <input type="checkbox"/> |
| Programas de educación nutricional en otros lugares | <input type="checkbox"/> | De internet                                      | <input type="checkbox"/> |
| De mis profesores                                   | <input type="checkbox"/> | De mis amigos                                    | <input type="checkbox"/> |
| De mis padres                                       | <input type="checkbox"/> | No tengo conocimientos sobre nutrición saludable | <input type="checkbox"/> |
| De mis entrenadores                                 | <input type="checkbox"/> | De:                                              |                          |

### SECCIÓN 1: NUTRICIÓN GENERAL

Las siguientes preguntas se refieren a la composición nutricional de algunos alimentos. Elige la respuesta con una X.

**1. El contenido de carbohidratos de estos alimentos es:**

|                   |   | Alto                     |   | Bajo o ausente           |  | No lo sé                 |
|-------------------|---|--------------------------|---|--------------------------|--|--------------------------|
| Jamón cocido      |   | <input type="checkbox"/> | * | <input type="checkbox"/> |  | <input type="checkbox"/> |
| Pan blanco        | * | <input type="checkbox"/> |   | <input type="checkbox"/> |  | <input type="checkbox"/> |
| Tomate            |   | <input type="checkbox"/> | * | <input type="checkbox"/> |  | <input type="checkbox"/> |
| Manzana           |   | <input type="checkbox"/> | * | <input type="checkbox"/> |  | <input type="checkbox"/> |
| Requesón          |   | <input type="checkbox"/> | * | <input type="checkbox"/> |  | <input type="checkbox"/> |
| Cereales desayuno | * | <input type="checkbox"/> |   | <input type="checkbox"/> |  | <input type="checkbox"/> |

**2. El contenido en proteínas de estos alimentos es:**

|                |   | Alto                     |   | Bajo o ausente           |  | No lo sé                 |
|----------------|---|--------------------------|---|--------------------------|--|--------------------------|
| Carne de pollo | * | <input type="checkbox"/> |   | <input type="checkbox"/> |  | <input type="checkbox"/> |
| Judías         | * | <input type="checkbox"/> |   | <input type="checkbox"/> |  | <input type="checkbox"/> |
| Pera           |   | <input type="checkbox"/> | * | <input type="checkbox"/> |  | <input type="checkbox"/> |
| Arroz          |   | <input type="checkbox"/> | * | <input type="checkbox"/> |  | <input type="checkbox"/> |
| Bacalao        | * | <input type="checkbox"/> |   | <input type="checkbox"/> |  | <input type="checkbox"/> |
| Parmesano      | * | <input type="checkbox"/> |   | <input type="checkbox"/> |  | <input type="checkbox"/> |
| Chocolate      |   | <input type="checkbox"/> | * | <input type="checkbox"/> |  | <input type="checkbox"/> |

**3. El contenido de grasa de estos alimentos es:**

|                 |   | Alto                     |   | Bajo o ausente           |  | No lo sé                 |
|-----------------|---|--------------------------|---|--------------------------|--|--------------------------|
| Salami          | * | <input type="checkbox"/> |   | <input type="checkbox"/> |  | <input type="checkbox"/> |
| Mayonesa        | * | <input type="checkbox"/> |   | <input type="checkbox"/> |  | <input type="checkbox"/> |
| Garbanzos secos |   | <input type="checkbox"/> | * | <input type="checkbox"/> |  | <input type="checkbox"/> |
| Pasta           |   | <input type="checkbox"/> | * | <input type="checkbox"/> |  | <input type="checkbox"/> |
| Mantequilla     | * | <input type="checkbox"/> |   | <input type="checkbox"/> |  | <input type="checkbox"/> |
| Jamón           |   | <input type="checkbox"/> | * | <input type="checkbox"/> |  | <input type="checkbox"/> |

**4. El contenido de fibra de estos alimentos es:**

|                |   | Alto                     |   | Bajo o ausente           |  | No lo sé                 |
|----------------|---|--------------------------|---|--------------------------|--|--------------------------|
| Miel           |   | <input type="checkbox"/> | * | <input type="checkbox"/> |  | <input type="checkbox"/> |
| Pan integral   | * | <input type="checkbox"/> |   | <input type="checkbox"/> |  | <input type="checkbox"/> |
| Caldo de pollo |   | <input type="checkbox"/> | * | <input type="checkbox"/> |  | <input type="checkbox"/> |
| Patatas        |   | <input type="checkbox"/> | * | <input type="checkbox"/> |  | <input type="checkbox"/> |
| Pera           |   | <input type="checkbox"/> |   | <input type="checkbox"/> |  | <input type="checkbox"/> |
| Pan blanco     | * | <input type="checkbox"/> | * | <input type="checkbox"/> |  | <input type="checkbox"/> |

5. El contenido de sal de estos alimentos es:

|                      |   | Alto                     |   | Bajo o ausente           |  | No lo sé                 |
|----------------------|---|--------------------------|---|--------------------------|--|--------------------------|
| Pan blanco           | ° | <input type="checkbox"/> |   | <input type="checkbox"/> |  | <input type="checkbox"/> |
| Calabacines          |   | <input type="checkbox"/> | * | <input type="checkbox"/> |  | <input type="checkbox"/> |
| Guisantes en lata    | * | <input type="checkbox"/> |   | <input type="checkbox"/> |  | <input type="checkbox"/> |
| Atún en lata         | * | <input type="checkbox"/> |   | <input type="checkbox"/> |  | <input type="checkbox"/> |
| Guisantes congelados |   | <input type="checkbox"/> | * | <input type="checkbox"/> |  | <input type="checkbox"/> |

6. El contenido de calcio de estos alimentos es:

|                 |   | Alto                     |   | Bajo o ausente           |  | No lo sé                 |
|-----------------|---|--------------------------|---|--------------------------|--|--------------------------|
| Pechuga de pavo |   | <input type="checkbox"/> | * | <input type="checkbox"/> |  | <input type="checkbox"/> |
| Guisantes       |   | <input type="checkbox"/> | * | <input type="checkbox"/> |  | <input type="checkbox"/> |
| Nueces          | * | <input type="checkbox"/> |   | <input type="checkbox"/> |  | <input type="checkbox"/> |
| Aceite de oliva |   | <input type="checkbox"/> | * | <input type="checkbox"/> |  | <input type="checkbox"/> |
| Pan integral    | * | <input type="checkbox"/> |   | <input type="checkbox"/> |  | <input type="checkbox"/> |

7. El contenido de hierro de estos alimentos es:

|                  |   | Alto                     |   | Bajo o ausente           |  | No lo sé                 |
|------------------|---|--------------------------|---|--------------------------|--|--------------------------|
| Carne de ternera | * | <input type="checkbox"/> |   | <input type="checkbox"/> |  | <input type="checkbox"/> |
| Manzana          |   | <input type="checkbox"/> | * | <input type="checkbox"/> |  | <input type="checkbox"/> |
| Miel             |   | <input type="checkbox"/> | * | <input type="checkbox"/> |  | <input type="checkbox"/> |
| Lubina           | * | <input type="checkbox"/> |   | <input type="checkbox"/> |  | <input type="checkbox"/> |

8. El contenido de potasio de estos alimentos es:

|                 |   | Alto                     |   | Bajo o ausente           |  | No lo sé                 |
|-----------------|---|--------------------------|---|--------------------------|--|--------------------------|
| Pasta           |   | <input type="checkbox"/> | * | <input type="checkbox"/> |  | <input type="checkbox"/> |
| Lentejas secas  | * | <input type="checkbox"/> |   | <input type="checkbox"/> |  | <input type="checkbox"/> |
| Aceite de oliva |   | <input type="checkbox"/> | * | <input type="checkbox"/> |  | <input type="checkbox"/> |
| Miel            |   | <input type="checkbox"/> | * | <input type="checkbox"/> |  | <input type="checkbox"/> |

¿Son estas afirmaciones verdaderas o falsas? (sólo es posible una respuesta)

|    |                                                                                                                 |                                      |                                 |                                   |
|----|-----------------------------------------------------------------------------------------------------------------|--------------------------------------|---------------------------------|-----------------------------------|
| 9  | La clara del huevo tiene un alto contenido de colesterol                                                        | VERDADERO <input type="checkbox"/>   | *FALSO <input type="checkbox"/> | NO LO SÉ <input type="checkbox"/> |
| 10 | Las comidas con alto contenido en grasa son siempre altas en colesterol                                         | VERDADERO <input type="checkbox"/>   | *FALSO <input type="checkbox"/> | NO LO SÉ <input type="checkbox"/> |
| 11 | El aceite de oliva es rico en grasas monoinsaturadas                                                            | * VERDADERO <input type="checkbox"/> | FALSO <input type="checkbox"/>  | NO LO SÉ <input type="checkbox"/> |
| 12 | Los frutos secos son una buena fuente de ácidos grasos esenciales                                               | * VERDADERO <input type="checkbox"/> | FALSO <input type="checkbox"/>  | NO LO SÉ <input type="checkbox"/> |
| 13 | Los quesos maduros son más salados que los frescos                                                              | * VERDADERO <input type="checkbox"/> | FALSO <input type="checkbox"/>  | NO LO SÉ <input type="checkbox"/> |
| 14 | Un alimento muy energético es exclusivamente un alimento graso                                                  | VERDADERO <input type="checkbox"/>   | *FALSO <input type="checkbox"/> | NO LO SÉ <input type="checkbox"/> |
| 15 | El pan integral es más rico en fibra que el blanco                                                              | * VERDADERO <input type="checkbox"/> | FALSO <input type="checkbox"/>  | NO LO SÉ <input type="checkbox"/> |
| 16 | El salvado es la parte exterior del grano que tiene un alto contenido en fibra                                  | * VERDADERO <input type="checkbox"/> | FALSO <input type="checkbox"/>  | NO LO SÉ <input type="checkbox"/> |
| 17 | Las legumbres en conserva son más saladas que las secas                                                         | * VERDADERO <input type="checkbox"/> | FALSO <input type="checkbox"/>  | NO LO SÉ <input type="checkbox"/> |
| 18 | El omega-3 y omega-6 son ácidos grasos particulares                                                             | * VERDADERO <input type="checkbox"/> | FALSO <input type="checkbox"/>  | NO LO SÉ <input type="checkbox"/> |
| 19 | Nuestro cuerpo crea vitamina D a partir de la luz solar directa sobre nuestra piel cuando estamos al aire libre | * VERDADERO <input type="checkbox"/> | FALSO <input type="checkbox"/>  | NO LO SÉ <input type="checkbox"/> |
| 20 | El hierro de la carne se absorbe más fácilmente que el mismo mineral que se encuentra en las verduras           | * VERDADERO <input type="checkbox"/> | FALSO <input type="checkbox"/>  | NO LO SÉ <input type="checkbox"/> |
| 21 | Diversos alimentos contienen una cantidad natural de sodio                                                      | * VERDADERO <input type="checkbox"/> | FALSO <input type="checkbox"/>  | NO LO SÉ <input type="checkbox"/> |
| 22 | Los lácteos son una buena fuente de hierro                                                                      | VERDADERO <input type="checkbox"/>   | *FALSO <input type="checkbox"/> | NO LO SÉ <input type="checkbox"/> |
| 23 | Las zanahorias son una buena fuente de vitamina A                                                               | * VERDADERO <input type="checkbox"/> | FALSO <input type="checkbox"/>  | NO LO SÉ <input type="checkbox"/> |

**24. El índice glucémico de un alimento: (sólo es posible una respuesta)**

Indica el contenido de carbohidratos de los alimentos

Indica el efecto de los alimentos sobre la glucosa en sangre de una persona

Indica el efecto de los alimentos sobre la glucosa en sangre de una persona tras la ingestión de proteínas

Indica la densidad energética de los alimentos

\*

☐  
☐  
☐  
☐
**¿Son estas afirmaciones verdaderas o falsas? (sólo es posible una respuesta)**

|    |                                                                                                                                         |                                      |                                 |                                   |
|----|-----------------------------------------------------------------------------------------------------------------------------------------|--------------------------------------|---------------------------------|-----------------------------------|
| 25 | Una dieta desequilibrada es el único factor de riesgo para el desarrollo de enfermedades cardiovasculares                               | VERDADERO <input type="checkbox"/>   | *FALSO <input type="checkbox"/> | NO LO SÉ <input type="checkbox"/> |
| 26 | En la obesidad la dieta juega un papel importante, la actividad física no                                                               | VERDADERO <input type="checkbox"/>   | *FALSO <input type="checkbox"/> | NO LO SÉ <input type="checkbox"/> |
| 27 | Una baja ingesta de calcio y vitamina D durante la vida, asociada a la falta de actividad física, puede aumentar el riesgo de fracturas | * VERDADERO <input type="checkbox"/> | FALSO <input type="checkbox"/>  | NO LO SÉ <input type="checkbox"/> |
| 28 | La fibra ayuda a aliviar el estreñimiento                                                                                               | * VERDADERO <input type="checkbox"/> | FALSO <input type="checkbox"/>  | NO LO SÉ <input type="checkbox"/> |
| 29 | Para conseguir una pérdida de peso saludable no se deben eliminar los carbohidratos de la dieta                                         | * VERDADERO <input type="checkbox"/> | FALSO <input type="checkbox"/>  | NO LO SÉ <input type="checkbox"/> |

**SECTION 2: NUTRICIÓN DEPORTIVA****¿Son estas afirmaciones verdaderas o falsas? (sólo es posible una respuesta)**

|    |                                                                                                                                            |                                     |                                 |                                   |
|----|--------------------------------------------------------------------------------------------------------------------------------------------|-------------------------------------|---------------------------------|-----------------------------------|
| 30 | Comer carbohidratos no es bueno para un atleta                                                                                             | VERDADERO <input type="checkbox"/>  | *FALSO <input type="checkbox"/> | NO LO SÉ <input type="checkbox"/> |
| 31 | Las vitaminas del grupo B desempeñan un papel importante en el metabolismo muscular                                                        | *VERDADERO <input type="checkbox"/> | FALSO <input type="checkbox"/>  | NO LO SÉ <input type="checkbox"/> |
| 32 | Los deportistas deben reducir la ingesta de grasa al mínimo                                                                                | VERDADERO <input type="checkbox"/>  | *FALSO <input type="checkbox"/> | NO LO SÉ <input type="checkbox"/> |
| 33 | Consumir hidratos de carbono después de las 17 h puede mejorar el rendimiento                                                              | VERDADERO <input type="checkbox"/>  | *FALSO <input type="checkbox"/> | NO LO SÉ <input type="checkbox"/> |
| 34 | Comer más proteínas hará que los músculos sean más grandes                                                                                 | VERDADERO <input type="checkbox"/>  | *FALSO <input type="checkbox"/> | NO LO SÉ <input type="checkbox"/> |
| 35 | Para una persona deportista, la ingesta diaria no debe incluir más del 15% de grasas                                                       | VERDADERO <input type="checkbox"/>  | *FALSO <input type="checkbox"/> | NO LO SÉ <input type="checkbox"/> |
| 36 | Los deportistas pueden comer lo que quieran porque tienen un metabolismo rápido                                                            | VERDADERO <input type="checkbox"/>  | *FALSO <input type="checkbox"/> | NO LO SÉ <input type="checkbox"/> |
| 37 | El ejercicio físico es el principal factor de mejora de la fuerza muscular                                                                 | *VERDADERO <input type="checkbox"/> | FALSO <input type="checkbox"/>  | NO LO SÉ <input type="checkbox"/> |
| 38 | Un consume excesivo de proteínas en la dieta puede provocar daños en el hígado y los riñones                                               | *VERDADERO <input type="checkbox"/> | FALSO <input type="checkbox"/>  | NO LO SÉ <input type="checkbox"/> |
| 39 | El deportista debe comer al final de la sesión de entrenamiento                                                                            | *VERDADERO <input type="checkbox"/> | FALSO <input type="checkbox"/>  | NO LO SÉ <input type="checkbox"/> |
| 40 | Es necesario reducir la ingesta de pasta, patatas y pan durante el periodo de entrenamiento                                                | VERDADERO <input type="checkbox"/>  | *FALSO <input type="checkbox"/> | NO LO SÉ <input type="checkbox"/> |
| 41 | Un hombre y una mujer de la misma edad que practican el mismo deporte tienen las mismas necesidades energéticas                            | VERDADERO <input type="checkbox"/>  | *FALSO <input type="checkbox"/> | NO LO SÉ <input type="checkbox"/> |
| 42 | Es aconsejable que el deportista tome una comida de bajo índice glucémico pero rica en hidratos de carbono, 1-2h después del entrenamiento | VERDADERO <input type="checkbox"/>  | FALSO <input type="checkbox"/>  | NO LO SÉ <input type="checkbox"/> |
| 43 | Los deportistas que practican un entrenamiento exhaustivo tienen el doble de necesidades proteicas que la población general                | VERDADERO <input type="checkbox"/>  | FALSO <input type="checkbox"/>  | NO LO SÉ <input type="checkbox"/> |
| 44 | Es necesario beber líquidos antes, durante y después de una competición                                                                    | VERDADERO <input type="checkbox"/>  | FALSO <input type="checkbox"/>  | NO LO SÉ <input type="checkbox"/> |
| 45 | Los entrenadores no deben permitir que se beba líquido durante un entrenamiento                                                            | VERDADERO <input type="checkbox"/>  | *FALSO <input type="checkbox"/> | NO LO SÉ <input type="checkbox"/> |
| 46 | El mejor consejo para los deportistas es que beban cuando tengan sed                                                                       | VERDADERO <input type="checkbox"/>  | *FALSO <input type="checkbox"/> | NO LO SÉ <input type="checkbox"/> |
| 47 | Para un deportista, el agua fría calma mejor la sed                                                                                        | VERDADERO <input type="checkbox"/>  | *FALSO <input type="checkbox"/> | NO LO SÉ <input type="checkbox"/> |
| 48 | Los deportistas pueden utilizar cubitos de hielo para calmar la sed durante el entrenamiento                                               | VERDADERO <input type="checkbox"/>  | *FALSO <input type="checkbox"/> | NO LO SÉ <input type="checkbox"/> |
| 49 | El agua es una gran ayuda para el rendimiento de los deportistas                                                                           | VERDADERO <input type="checkbox"/>  | FALSO <input type="checkbox"/>  | NO LO SÉ <input type="checkbox"/> |

|           |                                                                                                      |
|-----------|------------------------------------------------------------------------------------------------------|
| <b>50</b> | <i>Las bebidas deportivas y las energéticas son lo mismo</i>                                         |
|           | VERDADERO <input type="checkbox"/> *FALSO <input type="checkbox"/> NO LO SÉ <input type="checkbox"/> |
| <b>51</b> | <i>Las bebidas deportivas contienen minerales</i>                                                    |
|           | *VERDADERO <input type="checkbox"/> FALSO <input type="checkbox"/> NO LO SÉ <input type="checkbox"/> |

**52. ¿Cuál es la bebida más adecuada después de dos horas de formación?**

- Bebida energética ☐  
 Bebida deportiva \*☐  
 Zumo de frutas ☐  
 Cola ☐  
 No sé ☐

**¿Son estas afirmaciones verdaderas o falsas? (sólo es posible una respuesta)**

|           |                                                                                                                                 |
|-----------|---------------------------------------------------------------------------------------------------------------------------------|
| <b>53</b> | <i>Para los deportistas, los suplementos pueden utilizarse como sustituto válido de las comidas</i>                             |
|           | VERDADERO <input type="checkbox"/> *FALSO <input type="checkbox"/> NO LO SÉ <input type="checkbox"/>                            |
| <b>54</b> | <i>Para los deportistas, es imposible alcanzar los requerimientos de hierro, necesitan suplementos</i>                          |
|           | VERDADERO <input type="checkbox"/> *FALSO <input type="checkbox"/> NO LO SÉ <input type="checkbox"/>                            |
| <b>55</b> | <i>Las bebidas deportivas contienen cafeína</i>                                                                                 |
|           | VERDADERO <input type="checkbox"/> *FALSO <input type="checkbox"/> NO LO SÉ <input type="checkbox"/>                            |
| <b>56</b> | <i>Si los deportistas no son capaces de satisfacer sus necesidades de proteínas, necesitan tomar suplementos de aminoácidos</i> |
|           | *VERDADERO <input type="checkbox"/> FALSO <input type="checkbox"/> NO LO SÉ <input type="checkbox"/>                            |
| <b>57</b> | <i>Los suplementos son necesarios tanto en el deporte profesional como en el recreativo</i>                                     |
|           | VERDADERO <input type="checkbox"/> *FALSO <input type="checkbox"/> NO LO SÉ <input type="checkbox"/>                            |
| <b>58</b> | <i>Los complementos alimenticios son seguros, por lo que es correcto utilizarlos sin el asesoramiento de un experto</i>         |
|           | VERDADERO <input type="checkbox"/> *FALSO <input type="checkbox"/> NO LO SÉ <input type="checkbox"/>                            |
| <b>59</b> | <i>En los deportes de fuerza, los suplementos de vitamina C son siempre necesarios</i>                                          |
|           | VERDADERO <input type="checkbox"/> *FALSO <input type="checkbox"/> NO LO SÉ <input type="checkbox"/>                            |
| <b>60</b> | <i>Las comidas sin condimentar son la mejor opción para la construcción de músculos y la tonificación</i>                       |
|           | VERDADERO <input type="checkbox"/> *FALSO <input type="checkbox"/> NO LO SÉ <input type="checkbox"/>                            |
| <b>61</b> | <i>La carne y la clara de huevo contienen proteínas, los demás alimentos no. Esta es la base de la nutrición del deportista</i> |
|           | VERDADERO <input type="checkbox"/> *FALSO <input type="checkbox"/> NO LO SÉ <input type="checkbox"/>                            |
| <b>62</b> | <i>Los deportistas pueden comer productos "light" a su gusto</i>                                                                |
|           | VERDADERO <input type="checkbox"/> *FALSO <input type="checkbox"/> NO LO SÉ <input type="checkbox"/>                            |
